# Supplementary material
Source: publisher figshare collection journal article supplement (https://tandf.figshare.com/ndownloader/files/13255787)
Supplement: Supplementary file 1 [file 13255787]

| **Code** | **Location** | **Country** | **River system** | **Drainage basin** | **Collection date** | **Latitude** | **Longitude** | **N** | **MOTU-BIN** | **Reference** | | **Haplotype** | **GenBank accession codes** |
| --- | --- | --- | --- | --- | --- | --- | --- | --- | --- | --- | --- | --- | --- |
| BADF | spring in Bad Freienwalde ("Kurfürstenquelle") | DE | Oder | Baltic Sea | 22.06.2013 | 52.7739 | 14.0200 | 1 | C-BOLD:ACY7513 | this study | | h23 |  |
| BRI | creek "Ragöser Fließ" (NE Britz, close to Eberswalde) | DE | Oder | Baltic Sea | 22.06.2013 | 52.8918 | 13.8388 | 2 | E-BOLD:ACY7512 | this study | | h6 |  |
| EBE | creek at the Eberswalde Zoological Garden, inlet to stream Schwärze | DE | Oder | Baltic Sea | 21.09.2013 | 52.8238 | 13.7866 | 1 | C -BOLD:ACY7513 | this study | | h23 |  |
| LUN | creek in Lunow | DE | Oder | Baltic Sea | 22.06.2013 | 52.9168 | 14.1157 | 2 | E-BOLD:ACY7512 | this study | h16 | |  |
| NON-2 | Spechthausen, close to Eberswalde, inlet to stream Nonnenfließ | DE | Oder | Baltic Sea | 21.09.2013 | 52.8052 | 13.7681 | 2 | C-BOLD:ACY7513 | this study | h23, h28 | |  |
| SPE | Spechthausen close to Eberswalde, ditch at fish ponds | DE | Oder | Baltic Sea | 21.09.2013 | 52.8143 | 13.7931 | 2 | E-BOLD:ACY7512 | this study | h5 | |  |
| H11 | stream near Felsotarkany | H | Danube | Black Sea | 12.03.2011 | 47.983 | 20.44 | 2 | C-BOLD:ACY7513 | this study | h23 | |  |
| H16 | Sajo river close to Kesznyeten village | H | Danube | Black Sea | 14.03.2011 | 47.966 | 21.05 | 6 | A-BOLD:ACY7405 | this study | h41 | |  |
| 124W | river Bystra in Bohotnice | PL | Vistula | Baltic Sea | 14.10.2004 | 51.346 | 21.985 | 2 | F-BOLD:ACY7511 | this study | h1 | |  |
| 13OD | river Mysla in Chlewice | PL | Oder | Baltic Sea | 09.05.2001 | 52.661 | 14.502 | 4 | E-BOLD:ACY7512, C-BOLD:ACY7513 | this study | h7, h23 | |  |
| 1POL2 | Dabrowka Tuchowska | PL | Vistula | Baltic Sea |  | 49.8796 | 21.0504 | 1 | F-BOLD:ACY7511 | Copilaş-Ciocianu et al. 2017 | h1 | | KY618285 |
| 1POL3 | Jaworsko | PL | Vistula | Baltic Sea |  | 49.8995 | 20.7528 | 1 | C-BOLD:ACY7513 | Copilaş-Ciocianu et al. 2017 | h23 | | KY618288 |
| 31B | Roz stream in Mlynarze village | PL | Vistula | Baltic Sea | 07.06.2006 | 52.952 | 21.407 | 6 | C-BOLD:ACY7513 | this study | h23, h24 | |  |
| 43B | Lojewek river in Bozejewo | PL | Vistula | Baltic Sea | 06.06.2006 | 53.191 | 22.295 | 6 | C-BOLD:ACY7513 | this study | h23 | |  |
| 44OD | river Mysla in Chlewice | PL | Oder | Baltic Sea | 10.06.2005 | 52.661 | 14.502 | 3 | E-BOLD:ACY7512 | this study | h4 | |  |
| 71W | Sanna river in Borow | PL | Vistula | Baltic Sea | 28.10.1999 | 50.793 | 21.914 | 4 | C-BOLD:ACY7513 | this study | h23 | |  |
| 9MW | Omulew river in Wielbark | PL | Vistula | Baltic Sea | 11.06.2008 | 53.397 | 20.946 | 6 | C-BOLD:ACY7513 | this study | h23, h31 | |  |
| CYNK | stream in Cynkow n NalEczow | PL | Vistula | Baltic Sea | 03.09.2004 | 51.29 | 22.248 | 2 | F-BOLD:ACY7511 | this study | h1 | |  |
| FOS2 | stream near Ciezkowice | PL | Vistula | Baltic Sea | 20.10.2013 | 49.788 | 20.963 | 6 | C-BOLD:ACY7513 | this study | h23, h25, h27 | |  |
| FOS4 | small river near Rakow | PL | Vistula | Baltic Sea | 20.10.2013 | 50.701 | 21.013 | 5 | E-BOLD:ACY7512 | this study | h8, h21, h22 | |  |
| GRAB | Grabia in Kolumna | PL | Vistula | Baltic Sea | 12.10.2013 | 51.601 | 19.174 | 5 | E-BOLD:ACY7512, C-BOLD:ACY7513 | this study | h10, h19, h23 | |  |
| INO | karst spring in Inowlodz | PL | Vistula | Baltic Sea | 02.06.2012 | 51.526 | 20.222 | 6 | E-BOLD:ACY7512, C-BOLD:ACY7513 | this study | h9, h14, h15, h23 | |  |
| STR | stream Struga Dobieszkowska in Dobieszkow | PL | Vistula | Baltic Sea | 14.10.2013 | 51.852 | 19.596 | 5 | E-BOLD:ACY7512, C-BOLD:ACY7513 | this study | h9, h11, h23, h29 | |  |
| SZA | stream near Przyborowo | PL | Oder | Baltic Sea | 17.10.2013 | 52.551 | 16.554 | 5 | E-BOLD:ACY7512 | this study | h18 | |  |
| SZCZ | stream in Szlachtowa | PL | Vistula | Baltic Sea | 06.01.2014 | 49.406 | 20.537 | 11 | D-BOLD:ACY7510 | this study | h33, h34, h35, h36, h37, h38 | |  |
| W13-02B | Skrwa river | PL | Vistula | Baltic Sea | 08.11.2013 | 52.612 | 19.562 | 6 | E-BOLD:ACY7512, C-BOLD:ACY7513 | this study | h9, h17, h30 | |  |
| W13-03B | Tazyna stream | PL | Vistula | Baltic Sea | 08.11.2013 | 52.899 | 18.729 | 4 | F-BOLD:ACY7511, E-BOLD:ACY7512 | this study | h2, h3, h9 | |  |
| W13-07B | stream near Bielica | PL | Vistula | Baltic Sea | 09.11.2013 | 53.755 | 18.742 | 5 | E-BOLD:ACY7512 | this study | h12 | |  |
| W13-11B | stream in Biechow | PL | Vistula | Baltic Sea | 10.11.2013 | 50.371 | 20.991 | 6 | E-BOLD:ACY7512 | this study | h20 | |  |
| ZE | spring Elzbieta & Zygmunt | PL | Vistula | Baltic Sea | 06.06.2006 | 50.709 | 19.436 | 5 | C-BOLD:ACY7513 | this study | h23 | |  |
| 1SK12 | Levoca | SK | Danube | Black Sea |  | 49.0347 | 20.6004 | 1 | D-BOLD:ACY7510 | Copilaş-Ciocianu et al. 2017 | h35 | | KY618292 |
| 1SK13 | Ovcie | SK | Danube | Black Sea |  | 48.961 | 20.9938 | 1 | C-BOLD:ACY7513 | Copilaş-Ciocianu et al. 2017 | h24 | | KY618289 |
| 1SK15 | Mnisek nad Hnilcom | SK | Danube | Black Sea |  | 48.8089 | 20.8096 | 1 | B-BOLD:ACY7408 | Copilaş-Ciocianu et al. 2017 | h47 | | KY618296 |
| 1SK16 | Uhorna | SK | Danube | Black Sea |  | 48.7061 | 20.6776 | 1 | C-BOLD:ACY7513 | Copilaş-Ciocianu et al. 2017 | h43 | | KY618290 |
| 1SK19 | Telgart | SK | Danube | Black Sea |  | 48.8416 | 20.183 | 1 | B-BOLD:ACY7408 | Copilaş-Ciocianu et al. 2017 | h44 | | KY618293 |
| 1SK20 | Polomka | SK | Danube | Black Sea |  | 48.8526 | 19.8272 | 1 | B-BOLD:ACY7408 | Copilaş-Ciocianu et al. 2017 | h45 | | KY618294 |
| 1SLK4 | Bukovce | SK | Danube | Black Sea |  | 49.2624 | 21.695 | 1 | E-BOLD:ACY7512 | Copilaş-Ciocianu et al. 2017 | h42 | | KY618287 |
| 1SLK5 | Hutka | SK | Danube | Black Sea |  | 49.3944 | 21.4344 | 1 | F-BOLD:ACY7511 | Copilaş-Ciocianu et al. 2017 | h48 | | KY618286 |
| 1STU-POD | Podbiel | SK | Danube | Black Sea |  | 49.3087 | 19.4912 | 1 | B-BOLD:ACY7408 | Copilaş-Ciocianu et al. 2017 | h46 | | KY618295 |
| H20 | stream near Baldovice | SK | Danube | Black Sea | 17.03.2011 | 48.994 | 20.717 | 6 | D-BOLD:ACY7510 | this study | h32 | |  |
| H22 | stream near Polomka village | SK | Danube | Black Sea | 18.03.2011 | 48.851 | 19.847 | 6 | C-BOLD:ACY7513 | this study | h23, h26, h39 | |  |
| H24 | spring south Lubochna village | SK | Danube | Black Sea | 19.03.2011 | 49.096 | 19.145 | 2 | B-BOLD:ACY7408 | this study | h40 | |  |
